# Supplementary material
Source: Royal Society of Chemistry journal article supplement (doi:10.1039/d6ta00340k)
Supplement: d6ta00340k1.pdf [file d6ta00340k1.pdf]

## Supporting Information

### **Cyclic Voltammetry Driven Bi–Ag Single-Atom Alloy Electrocatalysts for Enhanced CO<sub>2</sub>-to-Formate Conversion**

Yongsu An<sup>a</sup>, Sunlun Kwon<sup>b</sup>, Young Heon Kim<sup>c</sup>, Chan Woo Lee<sup>d,\*</sup>, Duk-Young Jung<sup>a,\*</sup>

<sup>a</sup>Department of Chemistry, Sungkyun Advanced Institute of Nanotechnology (SAINT), Sungkyunkwan University, Suwon, 16419, Republic of Korea

<sup>b</sup>Department of Chemistry, The Catholic University of Korea, Bucheon, 14662, Republic of Korea

<sup>c</sup>Graduate School of Analytical Science and Technology (GRAST), Chungnam National University, Daejeon, 34134, Republic of Korea

<sup>d</sup>Department of Chemistry, Kookmin University, Seoul, 02707, Republic of Korea

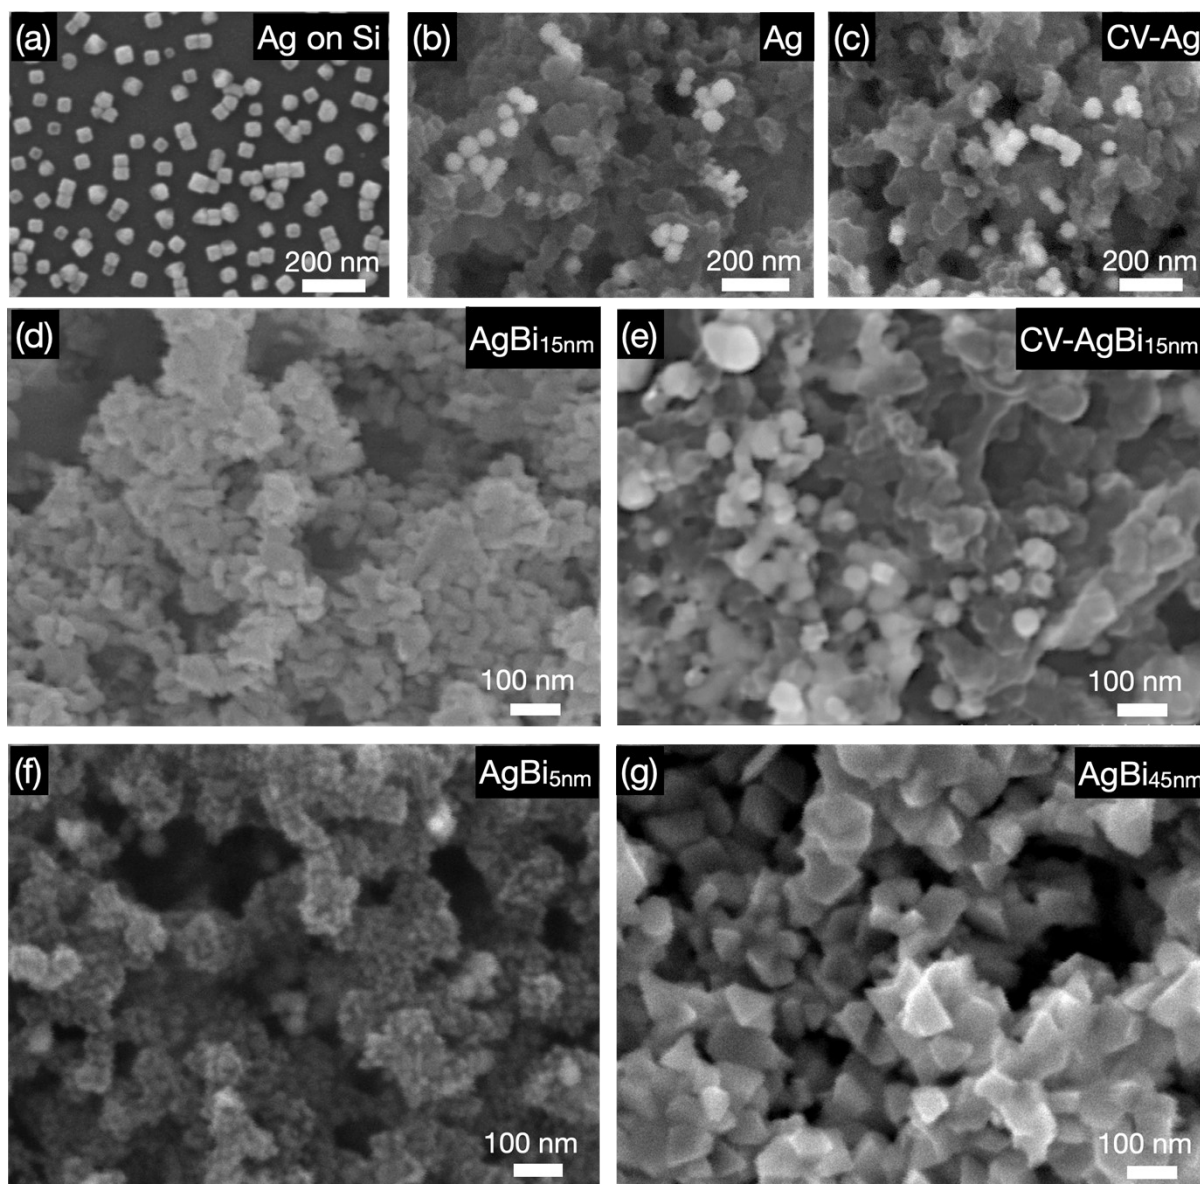

Fig. S1. SEM image of (a) Ag nanoparticles on Si wafer, (b) Ag on carbon paper (Ag), (c) CV treated Ag on carbon paper (CV-Ag), (d) Bi 15 nm layer on Ag (AgBi<sub>15nm</sub>), (e) CV treated Bi 15 nm layer on Ag (CV-AgBi<sub>15nm</sub>), (f) Bi 5 nm and (g) Bi 45 nm layer on Ag (AgBi<sub>5nm</sub> and AgBi<sub>45nm</sub>), respectively.

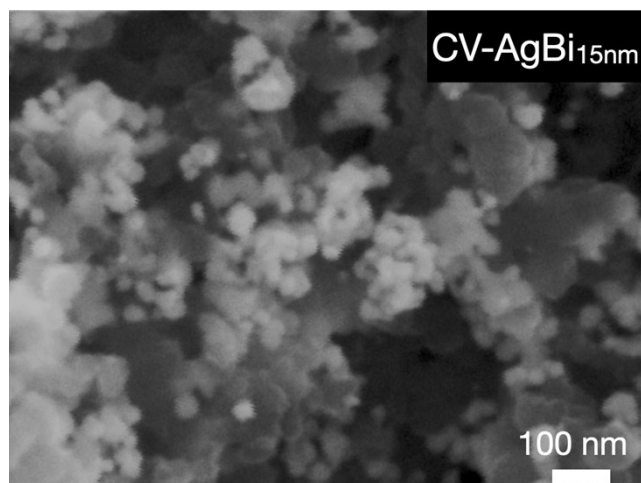

Fig. S2. SEM image of CV treated Bi 15 nm layer on Ag (CV-AgBi<sub>15nm</sub>) after 1 hour of CO<sub>2</sub>RR.

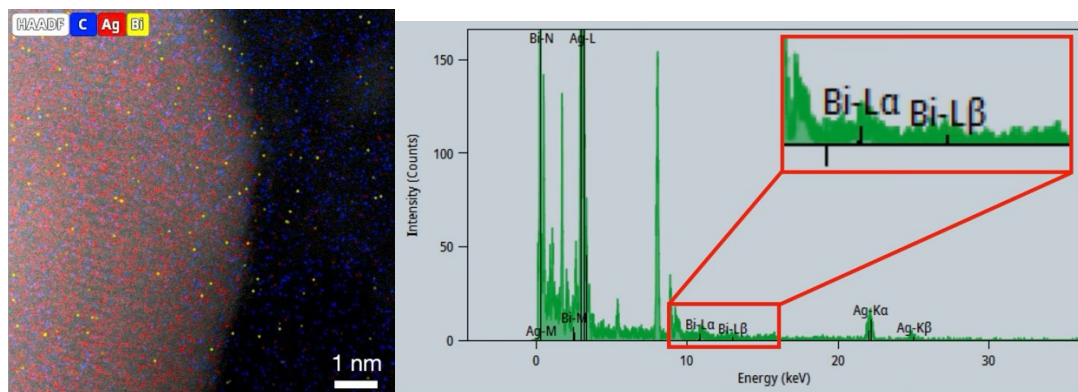

Fig. S3. HAADF-STEM-EDS spectrum of CV-AgBi<sub>15nm</sub>.

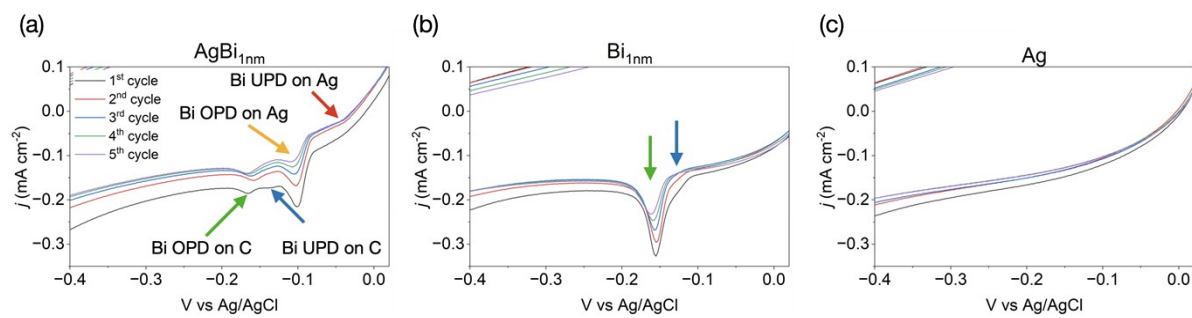

Fig. S4. Cyclic voltammetry curves of (a) AgBi<sub>1nm</sub>, (b) Bi<sub>1nm</sub> and (c) Ag, scanned from -0.9 to 0.08 V.

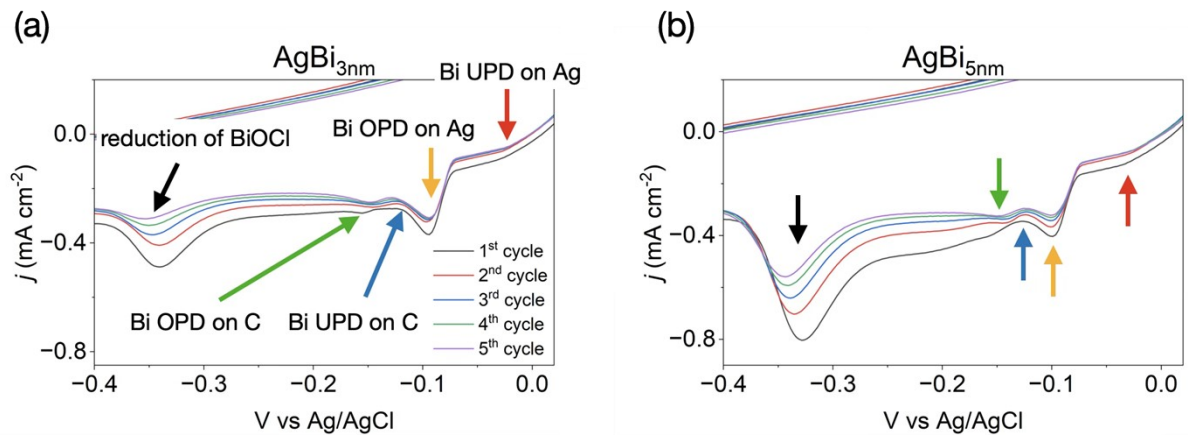

Fig. S5. Cyclic voltammetry curves of AgBi<sub>3nm</sub> and AgBi<sub>5nm</sub>, scanned from -0.9 to 0.08 V.

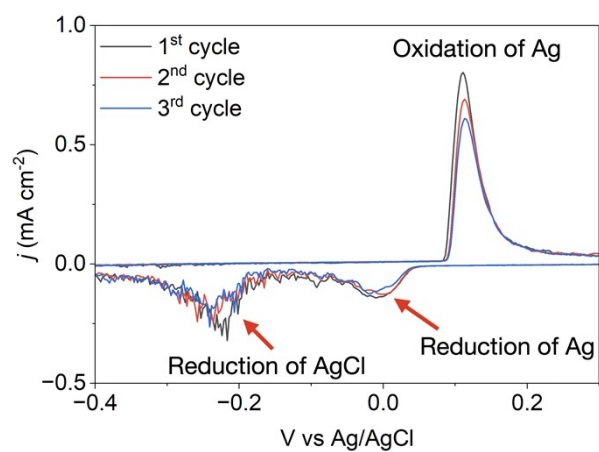

Fig. S6. Cyclic voltammetry curve of Ag, scanned from -0.9 to 0.5 V.

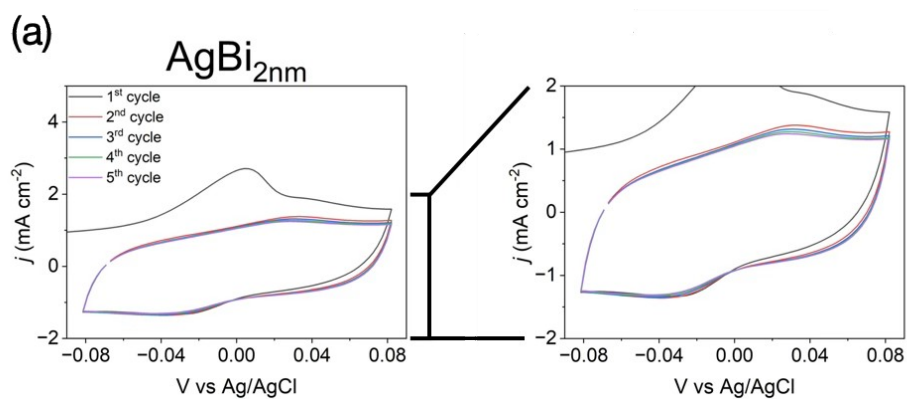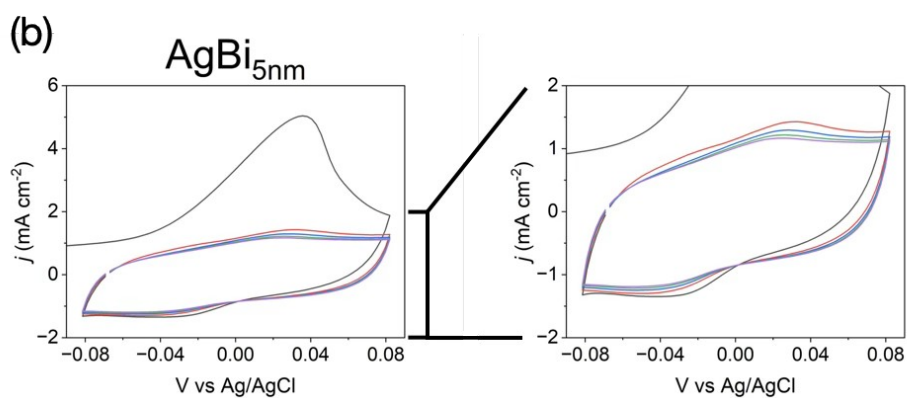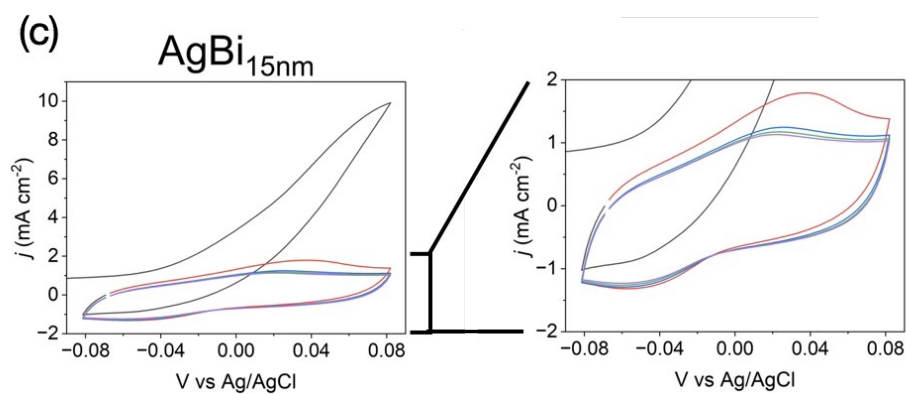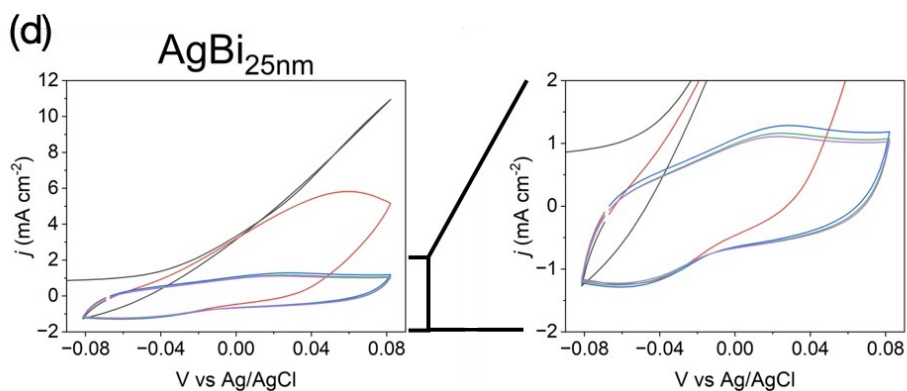

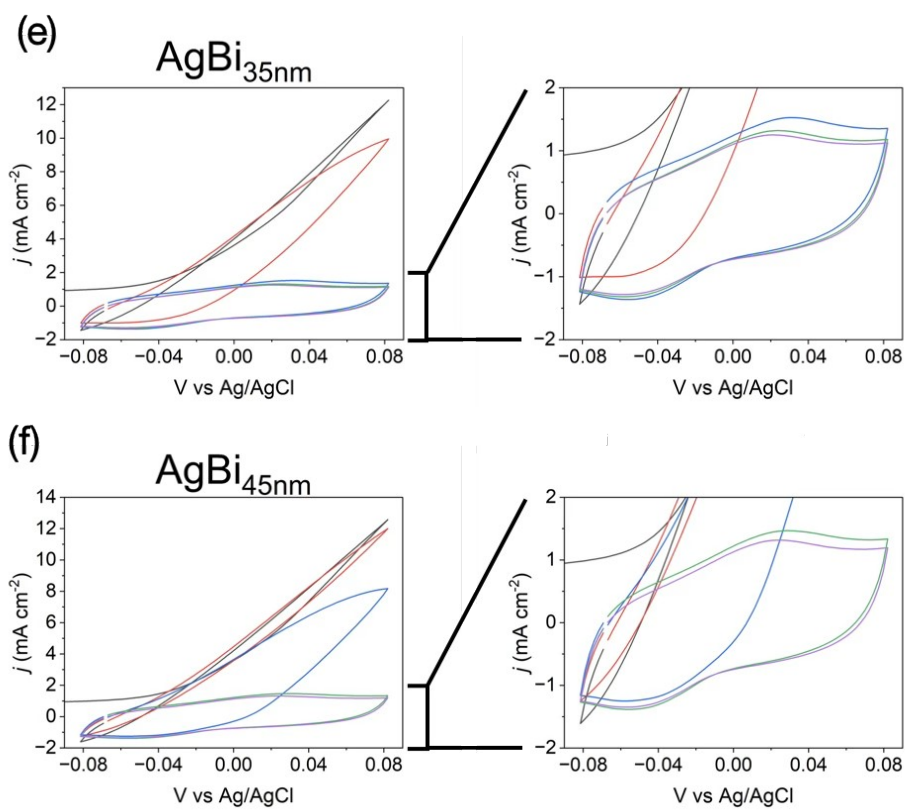

Fig. S7. Cyclic voltammety curves and their magnified Figures of (a) AgBi<sub>2nm</sub>, (b) AgBi<sub>5nm</sub>, (c) AgBi<sub>15nm</sub>, (d) AgBi<sub>25nm</sub>, (e) AgBi<sub>35nm</sub> and (f) AgBi<sub>45nm</sub>, respectively.

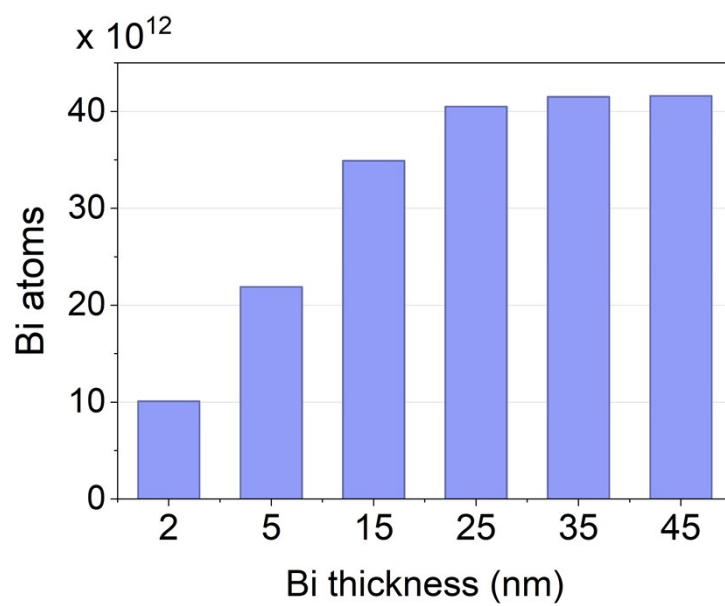

Fig. S8. The number of reduced Bi atoms on Ag calculated from the reduction peak of cyclic voltammetry curve.

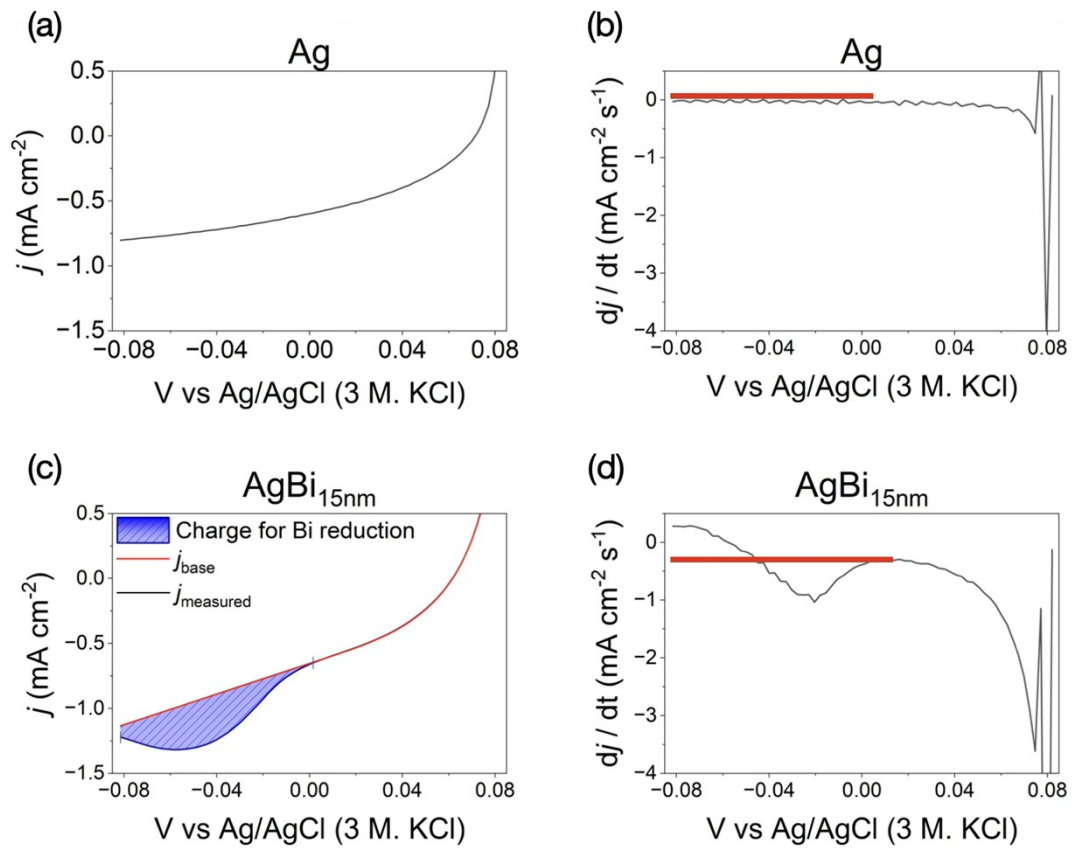

Fig. S9. Calculation of the amount of reduced Bi atoms from cyclic voltammetry curves.

### Quantification of reduced Bi from CV (Fig. S8)

The amount of reduced Bi was calculated from the cyclic voltammetry curves (Fig. S8) by differentiating the current density ( $j$ ) with respect to time and by reconstructing an Ag-like baseline. Direct subtraction of the Ag curve as a baseline was not adopted because current densities vary across samples and can't be completely fitted. In contrast,  $dj/dt$  for Ag was essentially constant for  $V \leq 0$  V (Fig. S8b), whereas the onset of Bi reduction in AgBi occurred at approximately 0 V. Accordingly, by setting values of  $dj/dt$  under 0 V equal to its value at  $V = 0$  V, the  $dj/dt$  curve of AgBi was constrained to an Ag-like constant, yielding the Ag-like  $dj/dt$  profile shown in Fig. S8d. And then, integration of this constrained  $dj/dt$  yielded the reconstructed baseline  $j_{\text{base}}$  (red line in Fig. S8c). The Bi reduction current was then obtained as  $j_{\text{measured}} - j_{\text{base}}$ , and the corresponding charge (blue-shaded area) as

$$Q_{\text{Bi}} = \frac{1}{\nu} \int_{-0.08}^0 [j_{\text{measured}} - j_{\text{base}}] dV$$

$$n_{\text{Bi}} = Q_{\text{Bi}} / (3F)$$

With  $\nu = 50$  mV s<sup>-1</sup>.

Based on the number of scans required for complete removal of Bi on carbon, the integration was carried out over 1st cycle for AgBi<sub>2nm</sub> and AgBi<sub>5nm</sub>, 2nd cycle for AgBi<sub>15nm</sub> and AgBi<sub>25nm</sub>, and 3rd cycle for AgBi<sub>35nm</sub> and AgBi<sub>45nm</sub>.

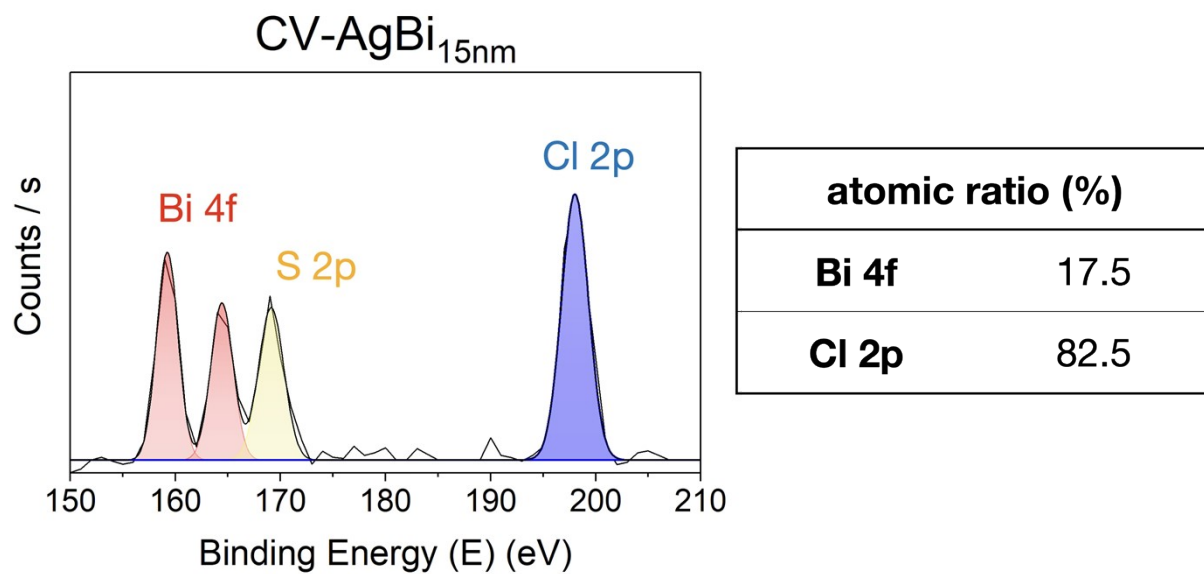

Fig. S10. Comparison of atomic ratio of Bi and Cl in CV-AgBi<sub>15nm</sub> based on the full scan XPS data.

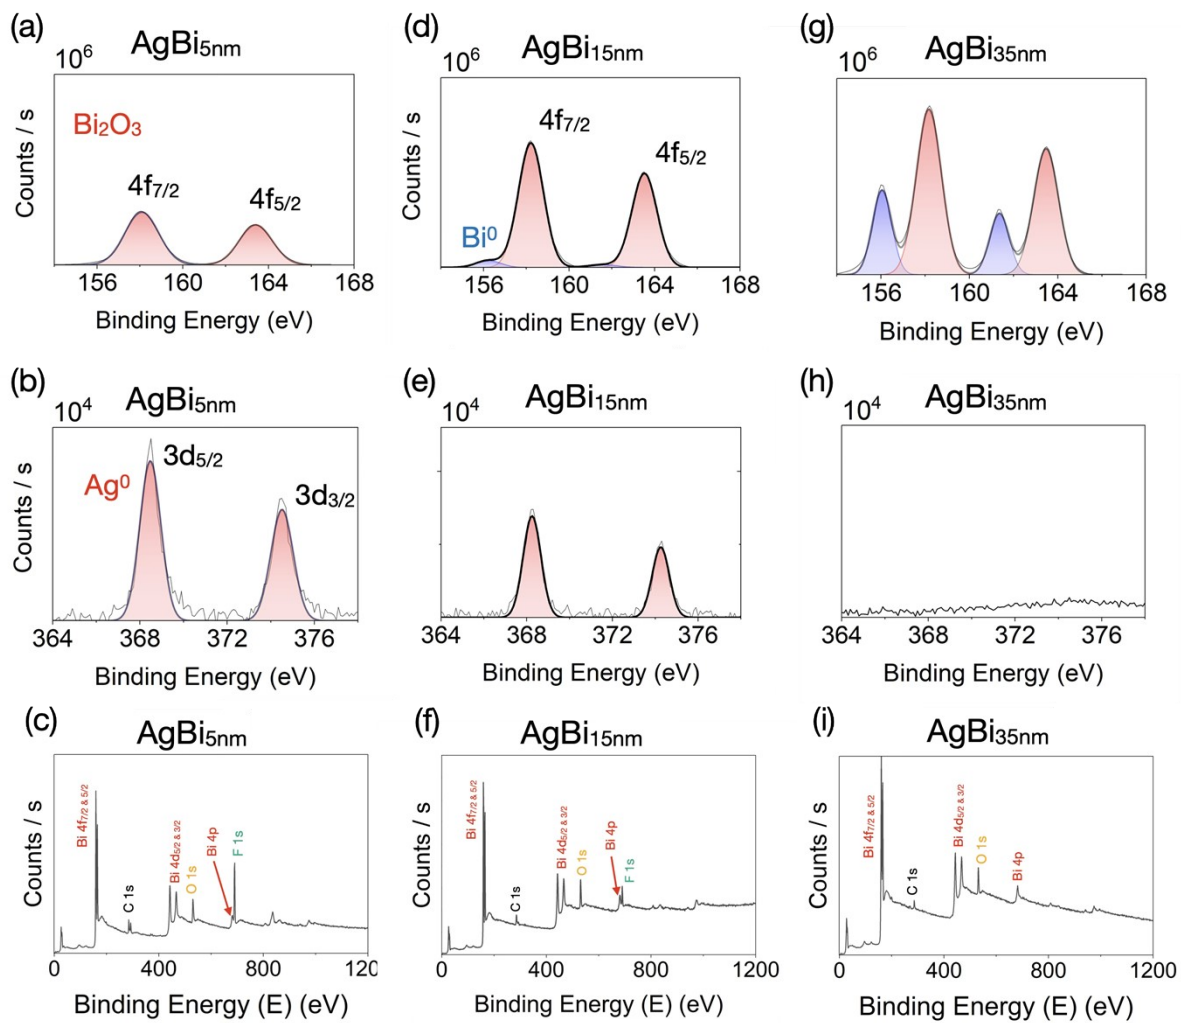

Fig. S11. XPS spectra of AgBi<sub>5nm</sub> (a–c), AgBi<sub>15nm</sub> (d–f) and AgBi<sub>35nm</sub> (g–i). Spectra are shown for (a, d, g) Bi 4f, (b, e, h) Ag 3d, and (c, f, i) full scan, respectively.

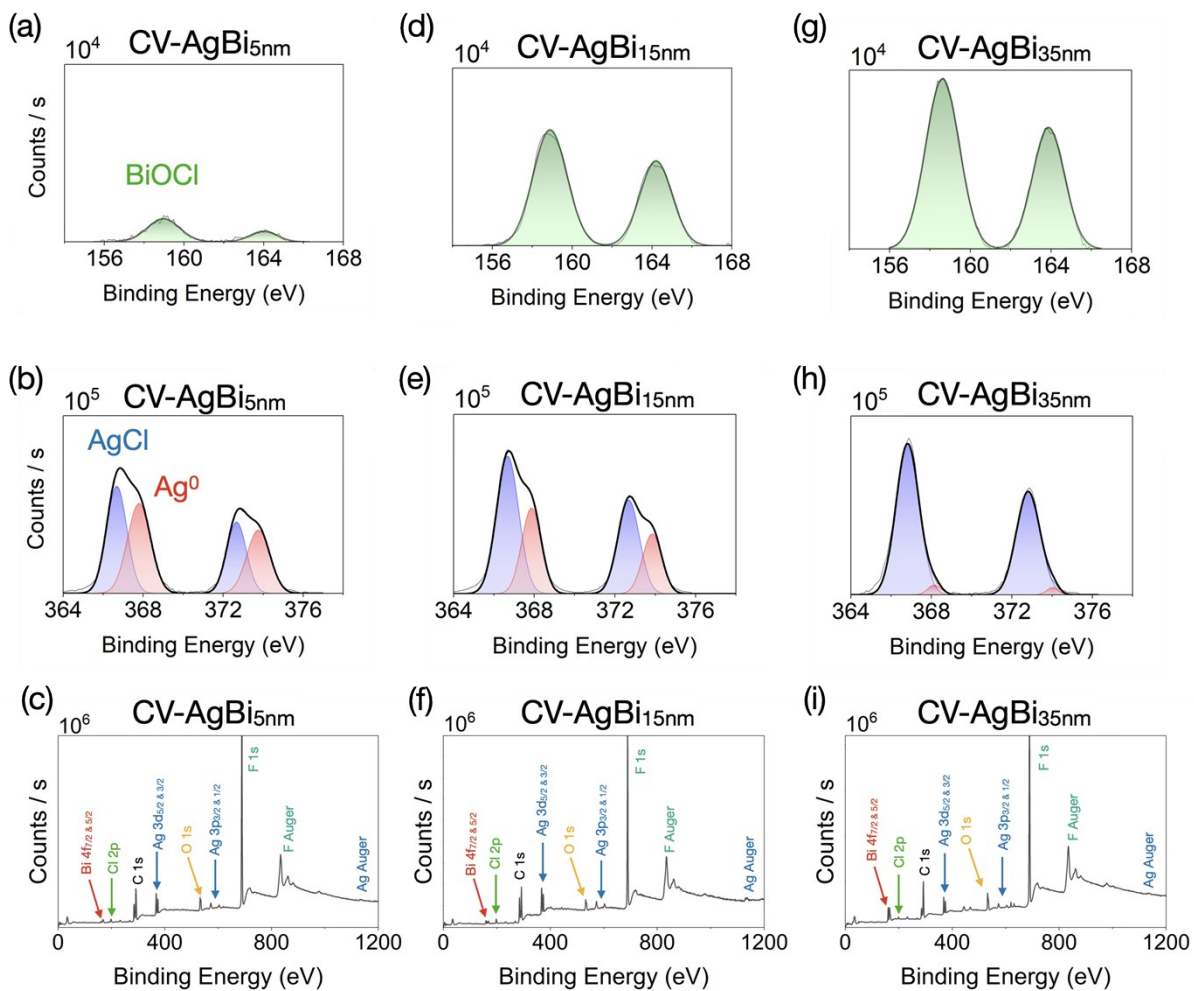

Fig. S12. XPS spectra of CV-AgBi<sub>5nm</sub> (a-c), CV-AgBi<sub>15nm</sub> (d-f) and CV-AgBi<sub>35nm</sub> (g-i). Spectra are shown for (a, d, g) Bi 4f, (b, e, h) Ag 3d, and (c, f, i) full scan, respectively.

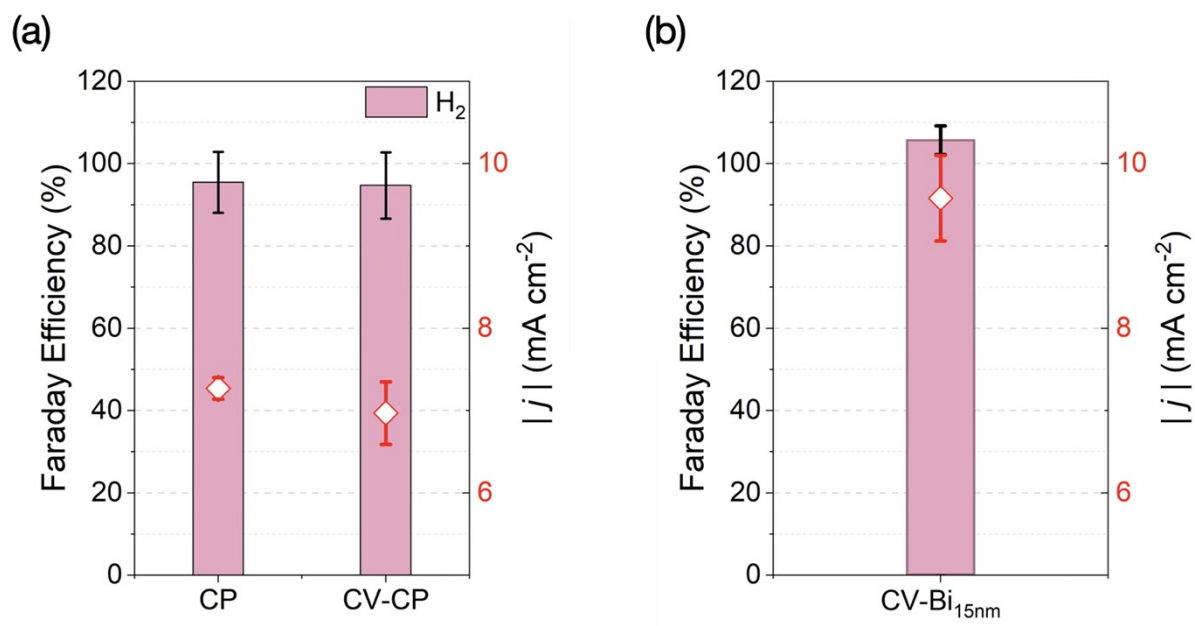

Fig. S13. Faraday efficiency of (a) CP and CV-CP, and of CV-Bi<sub>15nm</sub>.

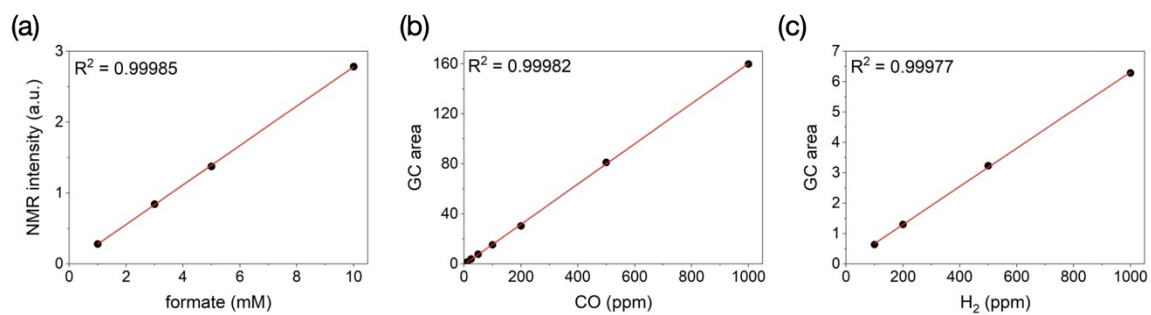

Fig. S14. Calibration curves for quantitative analysis. (a) The calibration curve of  $\text{HCOO}^-$  is obtained by plotting the relative area of  $\text{HCOO}^-$  signal of standard samples containing 1, 3, 5, 10 mM of  $\text{HCOO}^-$ . The calibration curves of (b) CO and (c)  $\text{H}_2$  are obtained by plotting the area of standard gases containing 10, 25, 50, 100, 200, 500, 1000 ppm of CO and 100, 200, 500, 1000 ppm of  $\text{H}_2$ , respectively.

| Element | AgBi <sub>15nm</sub>                             | Binding Energy (eV) | CV-AgBi <sub>15nm</sub>           | Binding Energy (eV) |
|---------|--------------------------------------------------|---------------------|-----------------------------------|---------------------|
| Ag      | Ag <sup>0</sup> 3d <sub>5/2</sub>                | 368.2               | Ag <sup>0</sup> 3d <sub>5/2</sub> | 367.9               |
|         | Ag <sup>0</sup> 3d <sub>3/2</sub>                | 374.3               | Ag <sup>0</sup> 3d <sub>3/2</sub> | 373.8               |
|         |                                                  |                     | AgCl 3d <sub>5/2</sub>            | 366.7               |
|         |                                                  |                     | AgCl 3d <sub>3/2</sub>            | 372.7               |
| Bi      |                                                  |                     | BiOCl 4f <sub>7/2</sub>           | 158.9               |
|         |                                                  |                     | BiOCl 4f <sub>5/2</sub>           | 164.2               |
|         | Bi <sub>2</sub> O <sub>3</sub> 4f <sub>7/2</sub> | 158.2               |                                   |                     |
|         | Bi <sub>2</sub> O <sub>3</sub> 4f <sub>5/2</sub> | 163.5               |                                   |                     |
|         | Bi <sup>0</sup> 4f <sub>7/2</sub>                | 156.2               |                                   |                     |
|         | Bi <sup>0</sup> 4f <sub>5/2</sub>                | 161.6               |                                   |                     |
| O       | O1                                               | 529.5               |                                   |                     |
|         | O2                                               | 530.5               |                                   |                     |
|         | C-O bonds                                        | 531.9               | C-O bonds                         | 531.7               |
|         |                                                  |                     | Nafion                            | 534.7               |

Table S1. Binding energy of each elements of AgBi samples from XPS data (O1 is from non-defective metal oxide and O2 is from defective metal oxide).

| JCPDS                                                | peak   |
|------------------------------------------------------|--------|
| Ag (111) #2-1098                                     | 38.28° |
| Ag <sub>99.5</sub> Bi <sub>0.5</sub> (111) # 65-8426 | 38.14° |
| Bi (104) #44-1246                                    | 37.95° |

Table S2. reference XRD peak from JCPDS.
